# Supplementary material for: Qualitative longitudinal study of episodic disability experiences of older women living with HIV in Ontario, Canada
Source: PubMed Central journal article supplement — BMJ Open. 2018 Apr 20;8(4):e021507. doi: 10.1136/bmjopen-2018-021507 (PMC5914902; doi:10.1136/bmjopen-2018-021507), 2018-04-20
Supplement: bmjopen-2018-021507.draft_revisions.pdf [file bmjopen-2018-021507.draft_revisions.pdf]

# BMJ Open

BMJ Open is committed to open peer review. As part of this commitment we make the peer review history of every article we publish publicly available.

When an article is published we post the peer reviewers' comments and the authors' responses online. We also post the versions of the paper that were used during peer review. These are the versions that the peer review comments apply to.

The versions of the paper that follow are the versions that were submitted during the peer review process. They are not the versions of record or the final published versions. They should not be cited or distributed as the published version of this manuscript.

BMJ Open is an open access journal and the full, final, typeset and author-corrected version of record of the manuscript is available on our site with no access controls, subscription charges or pay-per-view fees (<http://bmjopen.bmj.com>).

If you have any questions on BMJ Open's open peer review process please email [info.bmjopen@bmj.com](mailto:info.bmjopen@bmj.com)

# BMJ Open

## A Qualitative Longitudinal Study of Episodic Disability Experiences of Older Women Living with HIV

|                               |                                                                                                                                                                                                                                                                                                                                                                                            |
|-------------------------------|--------------------------------------------------------------------------------------------------------------------------------------------------------------------------------------------------------------------------------------------------------------------------------------------------------------------------------------------------------------------------------------------|
| Journal:                      | <i>BMJ Open</i>                                                                                                                                                                                                                                                                                                                                                                            |
| Manuscript ID                 | bmjopen-2018-021507                                                                                                                                                                                                                                                                                                                                                                        |
| Article Type:                 | Research                                                                                                                                                                                                                                                                                                                                                                                   |
| Date Submitted by the Author: | 05-Jan-2018                                                                                                                                                                                                                                                                                                                                                                                |
| Complete List of Authors:     | Solomon, Patricia; McMaster University, School of Rehabilitation Science<br>O'Brien, Kelly; University of Toronto, Physical Therapy<br>Nixon, Stephanie; University of Toronto, Physical Therapy<br>Letts, Lori; McMaster University, School of Rehabilitation Science<br>Baxter, Larry; Community HIV Volunteer<br>Gervais, Nicole; McMaster University, School of Rehabilitation Science |
| Keywords:                     | HIV, episodic disability, longitudinal analysis                                                                                                                                                                                                                                                                                                                                            |
|                               |                                                                                                                                                                                                                                                                                                                                                                                            |

SCHOLARONE™  
Manuscripts

Peer Review Only

1  
2  
3  
4  
5 A Qualitative Longitudinal Study of Episodic Disability Experiences of Older Women Living  
6 with HIV  
7  
8  
9

10  
11 Authors:

12  
13 Patricia Solomon<sup>1</sup>, Kelly K. O'Brien<sup>2</sup>, Stephanie Nixon<sup>2</sup>, Lori Letts<sup>1</sup>, Larry Baxter<sup>3</sup>, Nicole  
14 Gervais<sup>1</sup>  
15

16  
17 <sup>1</sup>School of Rehabilitation Science, McMaster University, Hamilton, ON, Canada

18 <sup>2</sup>Department of Physical Therapy, University of Toronto, Toronto, ON, Canada

19 <sup>3</sup>Community HIV Volunteer, Halifax, NS, Canada  
20  
21

22 Corresponding Author:

23  
24 Patricia Solomon, School of Rehabilitation Science, McMaster University, IAHS 403

25 1400 Main St. West, Hamilton, Ontario, Canada, L8S 1C7

26 Phone: 905-525-9140 ext. 27820

27 Fax: 905-524-0069

28 Email: solomon@mcmaster.ca  
29  
30  
31

32  
33 Keywords: HIV, episodic disability, longitudinal analysis  
34

35 Word Count: 3,970  
36  
37  
38  
39  
40  
41  
42  
43  
44  
45  
46  
47  
48  
49  
50  
51  
52  
53  
54  
55  
56  
57  
58  
59  
60

## ABSTRACT

**Objectives** To examine the episodic disability experiences of older women living with HIV over time.

**Design** Qualitative longitudinal study, conducting semi-structured in-depth interviews on four occasions over a 20-month time frame. Inductive thematic analyses were conducting cross-sectionally and longitudinally.

**Setting** Participants were recruited from community HIV organizations in Canada.

**Participants** Ten women 50 years of age or older living with HIV for greater than 6 years.

**Results** Two major themes related to the episodic nature of the women's disability. Women were living with multiple and complex sources of uncertainty over time including unpredictable health challenges, worrying about cognition, unreliable weather, fearing stigma and the effects of disclosure maintaining housing and adequate finances and fulfilling gendered and family roles. Women describe strategies to deal with uncertainty over time including withdrawing and limiting activities and participation and engaging in meaningful activities.

**Conclusions** The longitudinal study design highlighted the disabling effects of HIV in which unpredictable fluctuations in illness and health result in uncertainty and worrying about the future. Environmental factors such as stigma and weather may put older women living with HIV at a greater risk for social isolation. Strategies to promote dealing with uncertainty and building resilience are warranted.

### STRENGTHS AND LIMITATIONS OF THIS STUDY

- We conducted a longitudinal qualitative study of disability experienced by women living with HIV over the age of 50 years.
- We achieved a 100% retention rate of participants who were interviewed on four occasions over a 20-month time frame.
- We used a disability lens to understand the consequences of co-morbid health challenges and how the environmental context influences disability over time.
- This study did not include women diagnosed less than 6 years whose experiences may be very different from long term survivors.

## INTRODUCTION

Advances in HIV management have led to an increased life expectancy approaching that of the general population for people living with HIV.[1] This increased longevity for those with access to anti-retroviral therapy has resulted in the recognition of HIV as a chronic illness often accompanied by disability.[2] Disability associated with HIV may be experienced as episodic in nature, characterized by unpredictable fluctuating periods of good and ill health.[3]

The *Episodic Disability Framework* was derived from the perspective of men and women living with HIV.[3,4] The Framework conceptualizes disability as the health-related consequences of HIV, adverse effects of treatments and concurrent health conditions that may fluctuate over time. The Framework spans physical, mental, emotional, and social life domains including four dimensions of disability: symptoms and impairments, difficulties with day-to-day activities, challenges to social inclusion, and uncertainty about future health that may be influenced by extrinsic (e.g., social support, stigma) and intrinsic (e.g., living strategies, gender and age) contextual factors.

Evidence suggests women living with HIV have unique physical, psychosocial and biological needs.[5] However knowledge of the nature and extent of the disability experienced specifically among older women living with HIV is unclear. Understanding gender specific disability has become more germane with the increasing number of adults over the age of 50 years and as women account for an increasingly higher proportion of adults aging with HIV in North America.[6]

Existing literature suggests that disability experienced by older women living with HIV affects self-care, coping, cognition and social participation. A gender analysis of older women

1  
2  
3 aging with HIV revealed a complex model of social participation on a continuum from social  
4 isolation to social engagement.[7] Older African American women living with HIV find it more  
5 difficult to self-manage co-morbid conditions such as diabetes and hypertension.[8] Plach et  
6 al[9] conducted interviews with nine older women living with HIV and highlighted the  
7 importance for health providers to balance medical care with effective self-care. Psaros et al[10]  
8 identified multiple sources of uncertainty in their qualitative study examining how 19 women  
9 over 50 coped with living with HIV. Difficulty accepting the uncertainty of the disease course  
10 was a key barrier in transitioning to a healthy coping style. A recent review on aging and  
11 neurocognitive functioning from literature involving a large cohort study in the US found that  
12 HIV positive women performed worse on measures of verbal learning and memory, however  
13 mean ages were in the mid-40's.[11] Hence, there is increasing importance to consider the  
14 multidimensional impact of disability experienced by women aging with HIV.

15  
16  
17  
18  
19  
20  
21  
22  
23  
24  
25  
26  
27  
28  
29  
30  
31 The majority of studies on gender related differences in older adults living with HIV were  
32 cross-sectional in design. While Plach et al[9] examined disability longitudinally, this study did  
33 not capitalize on the longitudinal design by offering insights on the disability process over time.  
34 It is important to understand how the fluctuating nature of the illness impacts on daily lives and  
35 disability experiences of older women living with HIV. As with aging, episodic disability is a  
36 temporal process and the consequences and contributions to disablement can only be illuminated  
37 through longitudinal study. Our aim was to examine the disability experiences of older women  
38 living with HIV over time.

## 39 40 41 42 43 44 45 46 47 48 49 **METHODS**

50  
51 We conducted a longitudinal qualitative study involving a series of four semi-structured  
52 interviews with older women living with HIV at five month intervals. Participants were recruited  
53  
54  
55  
56  
57  
58  
59  
60

1  
2  
3 through HIV community organizations in Southern Ontario, through pamphlets onsite and  
4 recruitment notices on websites. Eligible participants were women 50 years of age or older, who  
5 were diagnosed with HIV more than 6 years ago.  
6  
7  
8  
9

10 We used the Episodic Disability Framework to guide the semi-structured interviews.  
11  
12 During the first interview (Time 1), we asked participants to provide a general description of  
13 their health challenges including physical, cognitive, mental and emotional symptoms and  
14 impairments, difficulties carrying out day to day activities and challenges to social inclusion. The  
15 challenges were then explored in detail, probing for how the episodic nature, uncertainty and  
16 contextual factors affected the challenge. We explored participants' living strategies and social  
17 supports used to address their health challenges. To promote reflection on the episodic nature of  
18 HIV, in subsequent interviews we explored the health challenges identified in Time 1 and asked  
19 participants to consider what changes occurred, how these occurred, and how these changes  
20 affected their functioning, disability, and health. Our design allowed for emergent themes to be  
21 discussed over time. Thus, while specific challenges identified in previous interviews were  
22 explored in subsequent interviews, interviews enabled participants to identify new challenges  
23 that arose over time. Participants were provided with an honorarium at the completion of each  
24 interview.  
25  
26  
27  
28  
29  
30  
31  
32  
33  
34  
35  
36  
37  
38  
39  
40  
41

42 Analysis: Interviews were audio-recorded, transcribed verbatim and entered into NVIVO  
43 9[12] for data management. Longitudinal analysis requires summary and comparison of data  
44 both cross-sectionally and longitudinally. Our analysis involved four steps: Step 1) After the  
45 Time 1 interviews, two investigators (PS and NG) independently carried out line by line coding  
46 of three transcripts and developed a code book to guide our analysis.[13] The remaining Time 1  
47 transcripts were then independently coded by two investigators from the research team using the  
48  
49  
50  
51  
52  
53  
54  
55  
56  
57  
58  
59  
60



1  
2  
3 code book. Using the coded transcripts at Time 1, we developed in depth *cross-sectional*  
4  
5 *summary profiles for each participant*. Step 2) To examine the episodic nature of each  
6  
7 participant's disability over time, we coded the data in a more structured way using the Episodic  
8  
9 Disability Framework as a guide. Each investigator reviewed the Time 2 transcript of a  
10  
11 participant and documented any changes (i.e., no change, improved or worsened) and/or new  
12  
13 symptoms that emerged since Time 1 in areas consistent with categories in the Framework. We  
14  
15 repeated this same process with the Time 3 and Time 4 transcripts for each participant. Step 3)  
16  
17 We developed an in-depth summary of each participant's experiences over time. The end result  
18  
19 of this step of the analysis was an *in-depth longitudinal summary profile that described the*  
20  
21 *episodic nature of disability experienced by each participant over time*. The summary profiles  
22  
23 for each participant were independently derived by two investigators and then amalgamated.  
24  
25 Step 4) We compared the longitudinal summary profiles of participants to identify *thematic*  
26  
27 *similarities and differences in the episodic nature of disability experiences among the*  
28  
29 *participants over time*.

## 30 31 32 33 34 35 **RESULTS**

36  
37 Ten women ranging from 51-61 years of age (median: 54 years; IQR= 52.25-58.75)  
38  
39 participated in this study, all of whom completed 4 interviews over a 20 month period. Median  
40  
41 time since diagnosis was 12.5 years (IQR=8-13.7). Three women reported being single, three  
42  
43 were married or living with a partner and four were divorced. Five women received disability  
44  
45 income support, three were working and two were seeking employment. Two women identified  
46  
47 as visible minorities (Asian, African-Canadian) and one woman was indigenous Canadian.  
48  
49  
50  
51  
52  
53  
54  
55  
56  
57  
58  
59  
60

We identified two major themes related to the episodic nature of participants' disability:

I) Living with multiple and complex sources of uncertainty over time, and II) Strategies for dealing with episodic disability over time. Themes and sub-themes are summarized in Figure 1.

## **I Living with multiple and complex sources of uncertainty over time**

Women were living with multiple, concurrent, evolving and overlapping sources of uncertainty which fluctuated over time. Some sources of uncertainty fluctuated minimally or remained stable over the period of the study. Women were managing complex and diverse fluctuations in their health challenges, co-morbidities and contextual factors which contributed to their uncertainty.

### **i) Unpredictable health challenges**

All participants experienced fluctuations in their health challenges over the duration of the study. For many there were significant fluctuations in fatigue, insomnia, pain, mood and cognition. These fluctuations led to worries about whether they would have the capacity to fulfill their roles and responsibilities. For some the uncertainty was incapacitating and meant they could not plan for activities. Some described fluctuations on a day to day making it difficult to predict how much they could accomplish that day. This woman talked about the challenges of discerning a "good" day from a "bad" day: "...I can't tell a good day from a bad day when I wake up. It's just when I get someplace and it just becomes bad." (P9)

Other fluctuations occurred over weeks or even months. Unpredictability of these health fluctuations were highlighted over time. Often a new diagnosis or health challenge would arise at one of the interviews and be resolved by the next interview. For example, one woman faced a

1  
2  
3 serious illness related to a urinary tract infection during interviews 2 and 3 which had resolved  
4  
5 by interview 4.  
6  
7

8  
9 The myriad health challenges experienced by the women led to worries about their health  
10 care and whether clinicians had the knowledge to deal with HIV-related issues. Some worried  
11 specifically about the knowledge related to women's needs.  
12  
13  
14  
15

16  
17 There's a lot of work to kind of being on top of [gynecological symptoms], and  
18 part of that is actually...educating and convincing doctors to pursue some of the  
19 tests that I think might be necessary. (P2)  
20  
21  
22  
23

24 For some, the ups and downs of their health challenges led to fears of getting seriously ill  
25 to the extent that they chose to remain home rather than interact with others. These fears were  
26 more evident during the winter months when there were increased probabilities of exposure to  
27 upper respiratory tract infections and influenza.  
28  
29  
30  
31  
32  
33

34 Always when there are bugs going around, I literally hibernate in my home if I  
35 can. I carry Lysol in my car...seriously, I'll wear a mask shopping and stuff  
36 because...I am so paranoid. (P5)  
37  
38  
39  
40  
41

#### 42 ii) Worrying about cognition 43 44

45 Although many of the women were aware of normal age-related changes related to  
46 cognition and memory, often lapses in memory or concentration led to concerns about HIV-  
47 related dementia. Two women sought testing for cognitive impairments over the course of the  
48 study due to their worries; the results indicated normal cognitive aging. Two were diagnosed  
49 with HIV-related dementia and both lost their drivers' license, though one woman successfully  
50  
51  
52  
53  
54  
55  
56  
57  
58  
59  
60

1  
2  
3 appealed this during the course of the study. Some women accepted their cognitive decline and  
4  
5 developed strategies such as note writing.  
6  
7

8 Take your meds. Yeah, I have forgotten...I still forget what I'm going to do. I  
9  
10 know a lot of people who...your attention...I got to go get something or whatever  
11  
12 and by the time you get there I stand there and try and figure out what am I here  
13  
14 for? (P9)  
15  
16

17  
18  
19 iii) Unreliable weather  
20

21 The unpredictability of adverse winter weather was a concern for many women. Cold  
22  
23 weather increased their pain, particularly joint and arthritic pain. Winter affected their mood and  
24  
25 contributed to decreased energy and depression. Affordable activities, such as walking and  
26  
27 cycling were curtailed by bad weather. Many felt “stressed” to be indoors and often felt an  
28  
29 increased sense of isolation. One woman described herself as “hibernating” in the winter. Some  
30  
31 did not venture outdoors due to a fear of falling. Women were aware of the effects of winter on  
32  
33 their mood and levels of participation and dreaded its arrival. Some worried about curtailing their  
34  
35 outdoor and social activities and becoming isolated, “There’s not very much to do in the winter. I  
36  
37 don’t really go out much, so I just hate it.” (P 8)  
38  
39  
40  
41  
42

43 iv) Fearing stigma and the effects of disclosure  
44  
45

46 These women worried about stigma related to gender, age, race, HIV status and sexual  
47  
48 orientation. Unemployment or precarious employment was often attributed to “being older”,  
49  
50 heterosexual, or a woman with perceptions that gay men or women of colour would get  
51  
52 preference for coveted paid positions in HIV community organizations. Self-stigma related to  
53  
54  
55  
56  
57  
58  
59  
60

1  
2  
3 HIV was evident among all women including those who appeared to thrive and those working in  
4  
5 HIV Community Organizations.  
6  
7

8 I applied for a job here for my boss and I didn't get the job and somebody else has  
9  
10 been in that job. Somebody else who is like a lot less qualified both educationally  
11  
12 and experientially but, you know, he's a gay man. (P2)  
13  
14  
15

16 Some women chose to limit their circle of disclosure due to a pervasive fear of stigma.  
17  
18 Uncertainty related to whether people would associate with them if they revealed their HIV  
19  
20 positive status. Some worried about accidental disclosure. One woman described how she felt  
21  
22 she had to limit her associations with friends from a HIV Community Organization as she didn't  
23  
24 know how she would explain these relationships to her family. Many women had not disclosed  
25  
26 to immediate family members. These worries and concerns often increased social isolation or  
27  
28 prohibited women from seeking supports from loved ones and friends.  
29  
30  
31  
32

33 I'm very scared. I pick who I want to mix with because if I mix with people and  
34  
35 they know my status, they won't want to mix with me. Believe me, that is the  
36  
37 truth. People do not mix with people with HIV. (P1)  
38  
39

#### 40 v) Maintaining housing and adequate finances

41  
42

43 Maintaining housing and adequate finances were closely linked as housing was often the  
44  
45 most significant living expense. The majority of women were in precarious employment, under-  
46  
47 employed or on government disability pensions. Women worried about ageism affecting their  
48  
49 employment status. Many women lived in supportive housing units, which over time became  
50  
51 undesirable due to conflicts with neighbours and concerns about living conditions. Some women  
52  
53  
54  
55  
56  
57  
58  
59  
60

1  
2  
3 had not worked in many years and had given up on finding employment. Others worked in  
4  
5 voluntary positions with HIV community organizations.  
6  
7

8  
9 So, I have anxieties...related to...the future...you know...financial concerns  
10  
11 about not earning enough money, and so therefore, not having as much savings as  
12  
13 I should, etc. etc. (P2).  
14  
15

#### 16 17 vi) Fulfilling gendered and family roles 18 19

20 Over time, women faced uncertainty related to fulfilling gendered roles primarily related to  
21  
22 caregiving and household responsibilities. As the women were older, their children were adults.  
23  
24 Nonetheless, women valued their role as mother. One woman discussed how her children were  
25  
26 living at home for the summer and how she was now cooking and doing their laundry. Another  
27  
28 woman had to accommodate her daughter and two small grandchildren in her apartment after a  
29  
30 failed relationship. Some women who were not permanently employed took on childcare  
31  
32 responsibilities for extended family. Several women discussed the need to care for their aging  
33  
34 parents.  
35  
36  
37

38  
39 I was having problems with being a grandmother and not being the grandma that I  
40  
41 wanted to be, you know, doing a good job and the responsibility of being a  
42  
43 grandmother, you know? (P9)  
44  
45  
46

## 47 **II Dealing with uncertainty over time** 48 49

50 The strategies that women used to navigate through the varied sources of uncertainty  
51  
52 were revealed over time. While some women were overwhelmed and withdrew from activities  
53  
54 and participation, others moved forward. Several women described a situation of isolation at the  
55  
56  
57

1  
2  
3 initial interviews but were able to make changes so that by the end of the study they described a  
4  
5 life which was more engaged.  
6

7  
8  
9 i) Withdrawing and limiting activities and participation

10  
11 Some women's sense of being overwhelmed led them to withdraw from activities,  
12  
13 becoming more socially isolated. This was particularly evident in women who were uncertain of  
14  
15 the consequences of HIV disclosure. Rather than seeking support and sharing their challenges  
16  
17 with others, they chose to limit whom they disclosed to and avoid others. One woman's social  
18  
19 withdrawal was related to fears of getting ill. Some recognized the need for social support but  
20  
21 were reluctant to "burden" family and friends. Other women were restricted by the winter  
22  
23 weather further reinforcing their isolation.  
24  
25  
26

27  
28 One of the reasons I was late this morning, my sister called me, I was almost  
29  
30 going through the door and I couldn't tell her no because I didn't want to lie to  
31  
32 her like, where are you going? Why can't you talk to me? And I sit and I had to  
33  
34 talk to her for about 15 minutes. She wouldn't let go. I told her I got to go, I was  
35  
36 telling her about something on sale today so she had the impression that I'm going  
37  
38 to go get this thing that's on sale and didn't know I'm coming all the way here but  
39  
40 I couldn't let her know. (P4)  
41  
42  
43  
44

45  
46 ii) Engaging in meaningful activities

47  
48 Some women sought activities that they felt contributed to their lives in meaningful ways.  
49  
50 For a few this meant paid employment, though as noted this was often precarious in nature. The  
51  
52 HIV Community Organizations provided an outlet for volunteer activities for many women; this  
53  
54 had the added benefits of not having to worry about disclosure and providing access to support  
55  
56  
57  
58  
59  
60

1  
2  
3 groups and education. Educating themselves about HIV led women to describe gaining a sense  
4 of control over their lives. The significant fluctuations in participation highlighted the relevance  
5 of the longitudinal inquiry; for example, one woman's life seemed hopeless at interviews 1 and  
6 2; she was depressed, isolated and said she couldn't plan for the future. By interview 4 it  
7 appeared that she had turned her life around; she changed her way of interacting with her  
8 children and ex-husband, got a pet to provide some structure and meaning in her life and found a  
9 part-time job. As she stated "I've learned I have resilience". (P3)

10  
11  
12  
13  
14  
15  
16  
17  
18  
19  
20 The women who appeared to thrive over time tended to maintain a positive outlook, some  
21 through social comparisons with others. They developed a sense of purpose whether through  
22 caring for pets, family members or work activities. Many made lifestyle changes including  
23 watching their diet, being more physically active and quitting smoking. In contrast, some women  
24 felt unable to plan or look at the future and described living "day by day". A few, in spite of the  
25 uncertainties, were forward thinking and had goals and aspirations.

26  
27  
28  
29  
30  
31  
32  
33  
34 I keep believing in my head I'm going to get a little bit better. I mean, maybe I  
35 won't get a whole lot better; I'm never obviously going to get back to what I was,  
36 you know, five years ago or whatever. (P10)

## 37 38 39 40 41 **DISCUSSION**

42  
43  
44 This study highlights the needs of older women living with HIV related to the episodic  
45 nature of disability and the associated uncertainty. The longitudinal study design allowed for a  
46 more nuanced understanding of uncertainty. In some instances the source of uncertainty was  
47 relatively stable over time (e.g., finances and housing) leading to chronic stressors. The episodic  
48 nature of chronic illness is increasingly recognized as an important characteristic impacting on  
49 disability.[14] Our study provided insights into the disabling effects of HIV in which unexpected



1  
2  
3 fluctuations in illness and health resulted in uncertainty and worrying about the future.  
4  
5  
6 Uncertainty is a defining feature of older people living with HIV[15] and as a contributor to  
7  
8 mental distress.[16] This study reinforces a model of disability of people aging with HIV which  
9  
10 had uncertainty as the core affecting all components of disability including symptoms and  
11  
12 impairments, difficulties in day to day activities and challenges to social participation.[17,18] By  
13  
14 following the women over time, the complexities of managing multiple health challenges which  
15  
16 fluctuated differentially is highlighted.  
17  
18

19  
20 Strengths of this research include the prolonged engagement and retention of all  
21  
22 participants over 20 months. In many instances, the participants were dealing with multiple  
23  
24 fluctuating health and social issues which often affected their ability to participate and engage in  
25  
26 their lives. If a single interview had occurred on a “good” or “bad” day the portrayal would be  
27  
28 much different and the challenges of the episodic nature of the illness would not be evident.  
29  
30 Other strengths are use of a disability lens as a foundation for this research which focused  
31  
32 attention on the health *consequences* of the comorbidities, how physical and mental health  
33  
34 diagnoses affect peoples’ lives and how environmental and personal contextual factors interact  
35  
36 with these over time. The longitudinal design of the study highlighted the uncertainty associated  
37  
38 with the challenges of managing multiple symptoms, co-morbidities and complex lives. Given  
39  
40 the potential consequences and the centrality of uncertainty in these women’s lives, developing  
41  
42 strategies to deal with stress and uncertainty in the overall management of people living with  
43  
44 HIV is essential.  
45  
46  
47  
48

49  
50 Limitations include our recruitment process through community HIV organizations, as  
51  
52 participants who access these resources may represent a more engaged and mobile group with  
53  
54 less disability. We also did not include women who were recently diagnosed with HIV, whose  
55  
56  
57  
58  
59  
60

1  
2  
3 experiences may be very different to women who are longer term survivors and may be living  
4 with the long term consequences of chronic HIV inflammation, long term toxicity of older  
5 medications and having left the work force in the past prior to the advent of combination  
6 antiretroviral therapy. We also recognize that some sources of uncertainty experienced may be  
7 similarly experienced by men and younger women living with HIV. Additionally the 20-month  
8 time frame of the study may have been insufficient to see fluctuations in more stable sources of  
9 uncertainty such as housing and unemployment.  
10  
11  
12  
13  
14  
15  
16  
17  
18

19 The women in our study experienced high levels of stress similarly reported by  
20 others.[11] Stress related factors may accelerate cognitive aging in people living with HIV.[11]  
21 Though many questions remain about the causal relationship, there is an association between  
22 anxiety and mild cognitive impairment in the general older population.[19] A multimodal  
23 integrative approach to the management of worry and anxiety, which includes exercise,  
24 mindfulness and cognitive training recommended for the general population,[19] is likely to be  
25 appropriate for a HIV population.  
26  
27  
28  
29  
30  
31  
32  
33  
34

35 Current models of disability highlight the importance of the environmental context. Our  
36 longitudinal study followed the seasons over time and highlight how the uncertainty of weather  
37 impacted mobility and social participation of the participants. Weather is a risk factor for social  
38 isolation, health and well-being in the general older adult population,[20] but yet to be  
39 specifically considered in the context of HIV. Given that older people living with HIV are at  
40 increased risks for the deleterious effects of social isolation,[21] strategies to combat this are  
41 warranted.  
42  
43  
44  
45  
46  
47  
48  
49  
50

51 Following participants over time revealed multiple forms of stigma experienced by  
52 women living with HIV and how it added to the complexity of uncertainty. Other gendered  
53  
54  
55  
56  
57  
58  
59  
60

1  
2  
3 societal variables such as oppression and economic dependence may also contribute to  
4  
5 maintaining stigmatizing attitudes.[5] Uncertainty related to the possible reactions from those  
6  
7 who were disclosed to prevented some women from receiving necessary supports. Many of these  
8  
9 concerns were not unfounded as women had experienced unwanted disclosure from health  
10  
11 providers and alienation from their families. Older women's reluctance to disclose their status,  
12  
13 even to family members, is of particular concern given their increased vulnerability for social  
14  
15 isolation.[7,22] The perception that some people living with HIV receive preferential treatment  
16  
17 due to varying characteristics (e.g., gender, ethnicity, age) speaks to the need for women to  
18  
19 navigate self-stigma within the HIV community in addition to within their personal lives. HIV  
20  
21 community organizations should consider the inclusiveness of programs to address stigma and  
22  
23 provide opportunities for the diversity of people aging with HIV.  
24  
25  
26  
27

28 The diversity of the challenges experienced by these women highlights the importance of  
29  
30 an interprofessional approach to HIV management. As HIV continues to evolve into a chronic  
31  
32 illness, there is a need to include rehabilitation professionals who focus on client centered  
33  
34 management of disability on the care team. Rehabilitation strategies promote self-management  
35  
36 approaches which help to deal with uncertainty through building skills and promoting self-  
37  
38 efficacy.[23] For example, occupational therapists can support women's personal, environmental  
39  
40 and occupational needs through facilitating workplace participation, advocating for funding and  
41  
42 assisting in navigating health care and political systems.[24] We agree that self-management  
43  
44 programs need to be flexible and tailored to the individual needs of people living with  
45  
46 HIV.[23,25] We also support the caution of Bernardin et al[23] that not all needs can be met  
47  
48 through chronic disease self-management programs. Basic social determinants of health such as  
49  
50 food and housing security may need to be met through concurrent programing.  
51  
52  
53  
54  
55  
56  
57  
58  
59  
60

1  
2  
3 Future research should include a quantitative examination of the synergistic and additive  
4 effects to further delineate the relationship between the episodic nature of disability and  
5 uncertainty in older women and men living with HIV. Additionally, in Canada indigenous  
6 populations are disproportionately affected by HIV and further exploration of their specific  
7 disability challenges are warranted. Ultimately the effectiveness of strategies to mitigate stress  
8 and uncertainty and minimize disability in older women living with HIV needs to be determined.  
9  
10  
11  
12  
13  
14  
15  
16  
17  
18  
19  
20  
21  
22  
23  
24  
25  
26  
27  
28  
29  
30  
31  
32  
33  
34  
35  
36  
37  
38  
39  
40  
41  
42  
43  
44  
45  
46  
47  
48  
49  
50  
51  
52  
53  
54  
55  
56  
57  
58  
59  
60

## Statements

### A. Contributorship statement

PS, KKO, SN and LL developed the research question and designed the study. PS, KKO, SN, LL, LB and NG participated in the data analysis. NG collected the data. PS drafted the manuscript. KKO, SN, LL, LB and NG contributed to the critical revision and redrafting of the manuscript.

### B. Competing Interests

None to declare.

### C. Funding

This work was supported by the Canadian Institutes of Health Research (CIHR) under grant HHP 131556. K.K. O'Brien and S.A. Nixon are supported by CIHR New Investigator Awards.

### D. Data Sharing Statement

No additional data are available.

## References

- 1 Antiretroviral Therapy Cohort Collaboration. Survival of HIV-positive patients starting antiretroviral therapy between 1996 and 2013: a collaborative analysis of cohort studies. *Lancet HIV* 2017;4(8):e349–e356.
- 2 Johns NA, Wu K, Tassiopoulos K, et al. Disability Among Middle-Aged and Older Persons With Human Immunodeficiency Virus Infection. *Clin Infect Dis* 2017;65(1):83–91.
- 3 O'Brien KK, Bayoumi AM, Strike C, et al. Exploring disability from the perspective of adults living with HIV/AIDS: development of a conceptual framework. *Health Qual Life Outcomes* 2008;6:76.
- 4 O'Brien KK, Davis AM, Strike C, et al. Putting episodic disability into context: a qualitative study exploring factors that influence disability experienced by adults living with HIV/AIDS. *J Int AIDS Soc* 2009;12:30.
- 5 Durvasula R. HIV/AIDS in older women: Unique challenges, unmet needs. *Behav Med* 2014;40(3):85–98.
- 6 Stoff DM, Colosi D, Rubtsova A, et al. HIV and Aging Research in Women: An Overview. *Curr HIV/AIDS Rep* 2016 Dec;13(6):383–91.
- 7 Siemon JS, Blenkhorn L, Wilkins S, et al. A grounded theory of social participation among older women living with HIV. *Can J Occup Ther* 2013;80(4):241–50.
- 8 Warren-Jeanpiere L, Dillaway H, Hamilton P, et al. Taking it one day at a time: African American women aging with HIV and co-morbidities. *AIDS Patient Care STDS* 2014;28(7):372–80.
- 9 Plach SK, Stevens PE, Keigher S. Self-care of women growing older with HIV and/or AIDS. *West J Nurs Res* 2005;27(5):534–53.
- 10 Psaros C, Barinas J, Robbins GK, et al. Reflections on living with HIV over time: exploring the perspective of HIV-infected women over 50. *Aging Ment Health* 2015;19(2):121–8.
- 11 Vance DE, Rubin LH, Valcour V, et al. Aging and neurocognitive functioning in HIV-infected women: A review of the literature involving the women's interagency HIV study. *Curr HIV/AIDS Rep* 2016;13:399–411.

- 1  
2  
3  
4  
5 12 NVivo qualitative data analysis Software; QSR International Pty Ltd. Version 9, 2010.  
6  
7  
8 13 Thomson R, Holland J. Hindsight, foresight and insight: The challenges of longitudinal  
9 qualitative research. *Int J Soc Res Meth* 2003;6(3):233-244.  
10  
11 14 Vajravelu S, O'Brien K, Moll S, et al. The impact of the episodic nature of chronic  
12 illness: a comparison of Fibromyalgia, Multiple Sclerosis and Human Immunodeficiency Virus  
13 (HIV). *Edorium J Disabil Rehabil* 2016;2:53–65.  
14  
15  
16 15 Rosenfeld D, Ridge D, Von Lob G, on behalf of the HIV and Later Life Team. Vital  
17 scientific puzzle or lived uncertainty? Professional and lived approaches to the uncertainties of  
18 ageing with HIV. *Health Sociol Rev* 2014;23(1):20–32.  
19  
20  
21 16 Furlotte C, Schwartz K. Mental Health Experiences of Older Adults Living with HIV:  
22 Uncertainty, Stigma, and Approaches to Resilience. *Can J Aging* 2017;36(2):125–40.  
23  
24  
25 17 Solomon P, O'Brien K, Wilkins S, et al. Aging with HIV: A model of disability. *J Int*  
26 *Assoc Provid AIDS Care* 2014;13(6):519-25.  
27  
28  
29 18 Solomon P, O'Brien KK, Wilkins S, et al. Aging with HIV and disability: The role of  
30 uncertainty. *AIDS Care* 2014;26(2):240–5.  
31  
32  
33 19 Lenze EJ, Butters MA. Consequences of anxiety in aging and cognitive decline. *Am J*  
34 *Geriatr Psychiatry* 2016;24(10):843-5.  
35  
36  
37 20 Clarke PJ, Yan T, Keusch F, et al. The Impact of Weather on Mobility and Participation  
38 in Older U.S. Adults. *Am J Public Health* 2015;105(7):1489–94.  
39  
40  
41 21 Emlet CA. An examination of the social networks and social isolation of older and  
42 younger adults living with HIV/AIDS. *Health Soc Work* 2006;31(4):299–308.  
43  
44  
45 22 Grodensky CA, Golin CE, Jones C, et al. "I should know better": The roles of  
46 relationships, spirituality, disclosure, stigma, and shame for older women living with HIV  
47 seeking support in the South. *J Assoc Nurses AIDS Care* 2015;26(1):12–23.  
48  
49  
50 23 Bernardin KN, Toews DN, Restall GJ, et al. Self-management strategies for people living  
51 with human immunodeficiency virus: A scoping review. *Can J Occup Ther* 2013;80(5):314–27.  
52  
53  
54  
55  
56  
57  
58  
59  
60

1  
2  
3 24 Akhtar NF, Garcha RK, Solomon P. Experiences of women aging with the human  
4 immunodeficiency virus: A qualitative study. *Can J Occup Ther* 2017 (in press). doi:  
5 10.1177/0008417417722574.  
6  
7

8 25 Swendeman D, Ingram BL, Rotheram-Borus MJ. Common elements in self-management  
9 of HIV and other chronic illnesses: An integrative framework. *AIDS Care* 2009;21(10):1321–24.  
10  
11  
12  
13  
14  
15  
16  
17  
18  
19  
20  
21  
22  
23  
24  
25  
26  
27  
28  
29  
30  
31  
32  
33  
34  
35  
36  
37  
38  
39  
40  
41  
42  
43  
44  
45  
46  
47  
48  
49  
50  
51  
52  
53  
54  
55  
56  
57  
58  
59  
60

For peer review only



1  
2  
3  
4  
5  
6  
7  
8  
9  
10  
11  
12  
13  
14  
15  
16  
17  
18  
19  
20  
21  
22  
23  
24  
25  
26  
27  
28  
29  
30  
31  
32  
33  
34  
35  
36  
37  
38  
39  
40  
41  
42  
43  
44  
45  
46  
47  
48  
49  
50  
51  
52  
53  
54  
55  
56  
57  
58  
59  
60

**Figure Legend:**

Themes and Sub-themes of Disability Experiences of Older Women Living with HIV Over Time

For peer review only

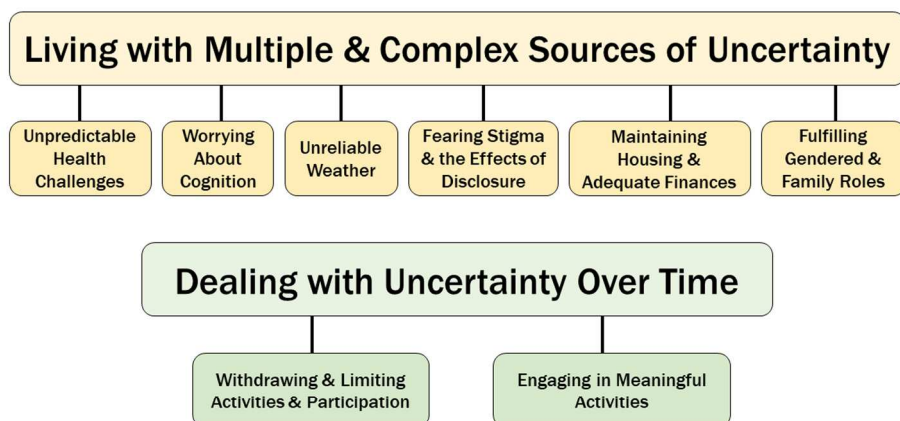

Figure 1. Themes and Sub-themes of Disability Experiences of Older Women Living with HIV Over Time

203x114mm (300 x 300 DPI)

# BMJ Open

## A Qualitative Longitudinal Study of Episodic Disability Experiences of Older Women Living with HIV in Ontario, Canada

|                                 |                                                                                                                                                                                                                                                                                                                                                                                            |
|---------------------------------|--------------------------------------------------------------------------------------------------------------------------------------------------------------------------------------------------------------------------------------------------------------------------------------------------------------------------------------------------------------------------------------------|
| Journal:                        | <i>BMJ Open</i>                                                                                                                                                                                                                                                                                                                                                                            |
| Manuscript ID                   | bmjopen-2018-021507.R1                                                                                                                                                                                                                                                                                                                                                                     |
| Article Type:                   | Research                                                                                                                                                                                                                                                                                                                                                                                   |
| Date Submitted by the Author:   | 15-Mar-2018                                                                                                                                                                                                                                                                                                                                                                                |
| Complete List of Authors:       | Solomon, Patricia; McMaster University, School of Rehabilitation Science<br>O'Brien, Kelly; University of Toronto, Physical Therapy<br>Nixon, Stephanie; University of Toronto, Physical Therapy<br>Letts, Lori; McMaster University, School of Rehabilitation Science<br>Baxter, Larry; Community HIV Volunteer<br>Gervais, Nicole; McMaster University, School of Rehabilitation Science |
| <b>Primary Subject Heading</b>: | HIV/AIDS                                                                                                                                                                                                                                                                                                                                                                                   |
| Secondary Subject Heading:      | Qualitative research                                                                                                                                                                                                                                                                                                                                                                       |
| Keywords:                       | HIV, episodic disability, longitudinal analysis                                                                                                                                                                                                                                                                                                                                            |
|                                 |                                                                                                                                                                                                                                                                                                                                                                                            |

SCHOLARONE™  
Manuscripts

1  
2  
3  
4 A Qualitative Longitudinal Study of Episodic Disability Experiences of Older Women Living  
5 with HIV in Ontario, Canada  
6  
7  
8  
9

10 Authors:

11  
12 Patricia Solomon<sup>1</sup>, Kelly K. O'Brien<sup>2</sup>, Stephanie Nixon<sup>2</sup>, Lori Letts<sup>1</sup>, Larry Baxter<sup>3</sup>, Nicole  
13 Gervais<sup>1</sup>  
14

15 <sup>1</sup>School of Rehabilitation Science, McMaster University, Hamilton, ON, Canada

16 <sup>2</sup>Department of Physical Therapy, University of Toronto, Toronto, ON, Canada

17 <sup>3</sup>Community HIV Volunteer, Halifax, NS, Canada  
18  
19  
20

21 Corresponding Author:

22  
23 Patricia Solomon, School of Rehabilitation Science, McMaster University, IAHS 403

24 1400 Main St. West, Hamilton, Ontario, Canada, L8S 1C7

25 Phone: 905-525-9140 ext. 27820

26 Fax: 905-524-0069

27 Email: solomon@mcmaster.ca  
28  
29  
30

31 Keywords: HIV, episodic disability, longitudinal analysis  
32  
33

34 Word Count: 4,066  
35  
36  
37  
38  
39  
40  
41  
42  
43  
44  
45  
46  
47  
48  
49  
50  
51  
52  
53  
54  
55  
56  
57  
58  
59  
60

## ABSTRACT

**Objectives** To examine the episodic disability experiences of older women living with HIV over time.

**Design** Qualitative longitudinal study, conducting semi-structured in-depth interviews on four occasions over a 20-month time frame. Inductive thematic analyses were conducting cross-sectionally and longitudinally.

**Setting** Participants were recruited from community HIV organizations in Canada.

**Participants** Ten women 50 years of age or older living with HIV for greater than 6 years.

**Results** Two major themes related to the episodic nature of the women's disability. Women were living with multiple and complex sources of uncertainty over time including: unpredictable health challenges, worrying about cognition, unreliable weather, fearing stigma and the effects of disclosure, maintaining housing and adequate finances, and fulfilling gendered and family roles. Women describe strategies to deal with uncertainty over time including withdrawing and limiting activities and participation and engaging in meaningful activities.

**Conclusions** This longitudinal study highlighted the disabling effects of HIV over time in which unpredictable fluctuations in illness and health resulted in uncertainty and worrying about the future. Environmental factors such as stigma and weather may put older women living with HIV at a greater risk for social isolation. Strategies to promote dealing with uncertainty and building resilience are warranted.

### STRENGTHS AND LIMITATIONS OF THIS STUDY

- We conducted a longitudinal qualitative study of disability experienced by women living with HIV over the age of 50 years.
- We achieved a 100% retention rate of participants who were interviewed on four occasions over a 20-month time frame.
- We used a disability lens to understand the consequences of co-morbid health challenges and how the environmental context influences disability over time.
- This study did not include women diagnosed less than 6 years whose experiences may be very different from long term survivors.

## INTRODUCTION

Advances in HIV management have led to an increased life expectancy approaching that of the general population for people living with HIV.[1] This increased longevity for those with access to anti-retroviral therapy has resulted in the recognition of HIV as a chronic illness often accompanied by disability.[2] Disability associated with HIV may be experienced as episodic in nature, characterized by unpredictable fluctuating periods of good and ill health.[3]

The *Episodic Disability Framework* was derived from the perspective of men and women living with HIV.[3,4] The Framework conceptualizes disability as the health-related consequences of HIV, adverse effects of treatments and concurrent health conditions that may fluctuate over time. The Framework spans physical, mental, emotional, and social life domains including four dimensions of disability: symptoms and impairments, difficulties with day-to-day activities, challenges to social inclusion, and uncertainty about future health that may be influenced by extrinsic (e.g., social support, stigma) and intrinsic (e.g., living strategies, gender and age) contextual factors.

Evidence suggests women living with HIV have unique physical, psychosocial and biological needs.[5] However knowledge of the nature and extent of the disability experienced specifically among older women living with HIV is unclear. Understanding gender specific disability has become more germane with the increasing number of adults over the age of 50 years and as women account for an increasingly higher proportion of adults aging with HIV in North America.[6]

Existing literature suggests that disability experienced by older women living with HIV affects self-care, coping, cognition and social participation. A gender analysis of older women

1  
2  
3 aging with HIV revealed a complex model of social participation on a continuum from social  
4 isolation to social engagement.[7] Older African American women living with HIV find it more  
5 difficult to self-manage co-morbid conditions such as diabetes and hypertension.[8] Plach et  
6 al[9] conducted interviews with nine older women living with HIV and highlighted the  
7 importance for health providers to balance medical care with effective self-care. Psaros et al[10]  
8 identified multiple sources of uncertainty in their qualitative study examining how 19 women  
9 over 50 coped with living with HIV. Difficulty accepting the uncertainty of the disease course  
10 was a key barrier in transitioning to a healthy coping style. A recent review on aging and  
11 neurocognitive functioning from literature involving a large cohort study in the US found that  
12 HIV positive women performed worse on measures of verbal learning and memory, however  
13 mean ages were in the mid-40's.[11] Hence, there is increasing importance to consider the  
14 multidimensional impact of disability experienced by women aging with HIV.

15  
16  
17  
18  
19  
20  
21  
22  
23  
24  
25  
26  
27  
28  
29  
30  
31 The majority of studies on gender related differences in older adults living with HIV were  
32 cross-sectional in design. While Plach et al[9] examined disability longitudinally, this study did  
33 not capitalize on the longitudinal design by offering insights on the disability process over time.  
34 It is important to understand how the fluctuating nature of the illness impacts on daily lives and  
35 disability experiences of older women living with HIV. As with aging, episodic disability is a  
36 temporal process and the consequences and contributions to disablement can only be illuminated  
37 through longitudinal study. Our aim was to examine the disability experiences of older women  
38 living with HIV over time.

## 39 40 41 42 43 44 45 46 47 48 49 **METHODS**

50  
51 We conducted a longitudinal qualitative study involving a series of four semi-structured  
52 interviews with older women living with HIV at five month intervals. Participants were recruited  
53  
54  
55  
56  
57  
58  
59  
60



1  
2  
3 through HIV community organizations in Southern Ontario, through pamphlets onsite and  
4 recruitment notices on websites. Eligible participants were women 50 years of age or older, who  
5 were diagnosed with HIV more than 6 years ago. Due to the large amount of data generated  
6 through longitudinal interviews, our aim was to retain a sample of 10 women overtime (yield of  
7 96 interviews).

8  
9  
10 We used the Episodic Disability Framework to guide the semi-structured interviews.  
11 During the first interview (Time 1), we asked participants to provide a general description of  
12 their health challenges including physical, cognitive, mental and emotional symptoms and  
13 impairments, difficulties carrying out day to day activities and challenges to social inclusion. The  
14 challenges were then explored in detail, probing for how the episodic nature, uncertainty and  
15 contextual factors affected the challenge. We explored participants' living strategies and social  
16 supports used to address their health challenges. To promote reflection on the episodic nature of  
17 HIV, in subsequent interviews we explored the health challenges identified in Time 1 and asked  
18 participants to consider what changes occurred, how these occurred, and how these changes  
19 affected their functioning, disability, and health. Our design allowed for emergent themes to be  
20 discussed over time. Thus, while specific challenges identified in previous interviews were  
21 explored in subsequent interviews, interviews enabled participants to identify new challenges  
22 that arose over time. Interviews were conducted by an investigator with experience in conducting  
23 qualitative interviews with vulnerable populations (NG). Participants were provided with an  
24 honorarium at the completion of each interview.

25  
26  
27 Analysis: All investigators contributed to the analyses. Investigators had complementary  
28 areas of expertise in gerontology, HIV, disability and personal experience growing older with  
29 HIV. Interviews were audio-recorded, transcribed verbatim and entered into NVIVO 9[12] for  
30

1  
2  
3 data management. Longitudinal analysis requires summary and comparison of data both cross-  
4 sectionally and longitudinally. Our analysis involved four steps: Step 1) After the Time 1  
5 interviews, two investigators (PS and NG) independently carried out line by line coding of three  
6 transcripts and developed a code book to guide our analysis.[13] The remaining Time 1  
7 transcripts were then independently coded by two investigators from the research team using the  
8 code book. Using the coded transcripts at Time 1, we developed in depth *cross-sectional*  
9 *summary profiles for each participant*. Step 2) To examine the episodic nature of each  
10 participant's disability over time, we coded the data in a more structured way using the Episodic  
11 Disability Framework as a guide. Each investigator reviewed the Time 2 transcript of a  
12 participant and documented any changes (i.e., no change, improved or worsened) and/or new  
13 symptoms that emerged since Time 1 in areas consistent with categories in the Framework. We  
14 repeated this same process with the Time 3 and Time 4 transcripts for each participant. Step 3)  
15 We developed an in-depth summary of each participant's experiences over time. The end result  
16 of this step of the analysis was an *in-depth longitudinal summary profile that described the*  
17 *episodic nature of disability experienced by each participant over time*. The summary profiles  
18 for each participant were independently derived by two investigators and then amalgamated.  
19 Step 4) We compared the longitudinal summary profiles of participants to identify *thematic*  
20 *similarities and differences in the episodic nature of disability experiences among the*  
21 *participants over time*.

22  
23  
24  
25  
26  
27  
28  
29  
30  
31  
32  
33  
34  
35  
36  
37  
38  
39  
40  
41  
42  
43  
44  
45  
46  
47 This research was approved by Research Ethics Boards of McMaster University and  
48  
49  
50  
51  
52  
53  
54  
55  
56  
57  
58  
59  
60  
University of Toronto. All participants provided informed consent.

## **Patient and Public Involvement**

A community member was included on the research team as one of the investigators. He reviewed and provided input on the research question and design prior to grant submission and was involved in the analysis and interpretation of the findings. Results of this study will be distributed to participants who indicated that they would like a copy of the research findings and provided contact information.

## **RESULTS**

Ten women ranging from 51-61 years of age (median: 54 years; IQR= 52.25-58.75) participated in this study, all of whom completed 4 interviews over a 20 month period. Median time since diagnosis was 12.5 years (IQR=8-13.7). Three women reported being single, three were married or living with a partner and four were divorced. Five women received disability income support, three were working and two were seeking employment. Two women identified as visible minorities (Asian, African-Canadian) and one woman was indigenous Canadian.

We identified two major themes related to the episodic nature of participants' disability: I) Living with multiple and complex sources of uncertainty over time, and II) Strategies for dealing with episodic disability over time. Themes and sub-themes are summarized in Figure 1.

### **I Living with multiple and complex sources of uncertainty over time**

Women were living with multiple, concurrent, evolving and overlapping sources of uncertainty which fluctuated over time. Some sources of uncertainty fluctuated minimally or remained stable over the period of the study. Women were managing complex and diverse fluctuations in their health challenges, co-morbidities and contextual factors which contributed to their uncertainty.

1  
2  
3 i) Unpredictable health challenges  
4  
5

6 All participants experienced fluctuations in their health challenges over the duration of  
7 the study. For many there were significant fluctuations in fatigue, insomnia, pain, mood and  
8 cognition. These fluctuations led to worries about whether they would have the capacity to fulfill  
9 their roles and responsibilities. For some the uncertainty was incapacitating and meant they could  
10 not plan for activities. Some described fluctuations on a day to day making it difficult to predict  
11 how much they could accomplish that day. This woman talked about the challenges of discerning  
12 a “good” day from a “bad” day: “...I can’t tell a good day from a bad day when I wake up. It’s  
13 just when I get someplace and it just becomes bad.” (P9)  
14  
15  
16  
17  
18  
19  
20  
21  
22  
23  
24

25 Other fluctuations occurred over weeks or even months. Unpredictability of these health  
26 fluctuations were highlighted over time. Often a new diagnosis or health challenge would arise at  
27 one of the interviews and be resolved by the next interview. For example, one woman faced a  
28 serious illness related to a urinary tract infection during interviews 2 and 3 which had resolved  
29 by interview 4.  
30  
31  
32  
33  
34  
35  
36  
37

38 The myriad health challenges experienced by the women led to worries about their health  
39 care and whether clinicians had the knowledge to deal with HIV-related issues. Some worried  
40 specifically about the knowledge related to women’s needs.  
41  
42  
43  
44

45 There’s a lot of work to kind of being on top of [gynecological symptoms], and  
46 part of that is actually...educating and convincing doctors to pursue some of the  
47 tests that I think might be necessary. (P2)  
48  
49  
50  
51  
52

53 The ups and downs of the women’s health challenges led to fears of getting seriously ill  
54 to the extent that they chose to remain home rather than interact with others. These fears were  
55  
56  
57

1  
2  
3 more evident during the winter months when there were increased probabilities of exposure to  
4  
5 upper respiratory tract infections and influenza.  
6

7  
8 Always when there are bugs going around, I literally hibernate in my home if I  
9  
10 can. I carry Lysol in my car...seriously, I'll wear a mask shopping and stuff  
11  
12 because...I am so paranoid. (P5)  
13  
14  
15

16 ii) Worrying about cognition  
17

18  
19 Although many of the women were aware of normal age-related changes related to  
20  
21 cognition and memory, lapses in memory or concentration led to concerns about HIV-related  
22  
23 dementia in six women. Two women sought testing for cognitive impairments over the course of  
24  
25 the study due to their worries; the results indicated normal cognitive aging. Two were diagnosed  
26  
27 with HIV-related dementia and both lost their drivers' license, though one woman successfully  
28  
29 appealed this during the course of the study. Some women accepted their cognitive decline and  
30  
31 developed strategies such as note writing.  
32  
33  
34  
35

36 Take your meds. Yeah, I have forgotten...I still forget what I'm going to do. I  
37  
38 know a lot of people who...your attention...I got to go get something or whatever  
39  
40 and by the time you get there I stand there and try and figure out what am I here  
41  
42 for? (P9)  
43  
44  
45

46 iii) Unreliable weather  
47

48  
49 The unpredictability of adverse winter weather was a concern for seven of the women.  
50  
51 Cold weather increased their pain, particularly joint and arthritic pain. Winter affected their  
52  
53 mood and contributed to decreased energy and depression. Affordable activities, such as walking  
54  
55  
56  
57

1  
2  
3 and cycling were curtailed by bad weather. Many felt “stressed” to be indoors and often felt an  
4 increased sense of isolation. One woman described herself as “hibernating” in the winter. Some  
5 did not venture outdoors due to a fear of falling. Women were aware of the effects of winter on  
6 their mood and levels of participation and dreaded its arrival. Some worried about curtailing their  
7 outdoor and social activities and becoming isolated, “There’s not very much to do in the winter. I  
8 don’t really go out much, so I just hate it.” (P 8)  
9  
10  
11  
12  
13  
14  
15  
16

17  
18 iv) Fearing stigma and the effects of disclosure  
19

20  
21 These women worried about stigma related to gender, age, race, HIV status and sexual  
22 orientation. Unemployment or precarious employment was often attributed to “being older”,  
23 heterosexual, or a woman with perceptions that gay men or women of colour would get  
24 preference for coveted paid positions in HIV community organizations. Self-stigma related to  
25 HIV was evident among all women including those who appeared to thrive and those working in  
26 HIV Community Organizations.  
27  
28  
29  
30  
31  
32  
33  
34

35 I applied for a job here for my boss and I didn’t get the job and somebody else has  
36 been in that job. Somebody else who is like a lot less qualified both educationally  
37 and experientially but, you know, he’s a gay man. (P2)  
38  
39  
40  
41  
42

43 Six women chose to limit their circle of disclosure due to a pervasive fear of stigma.  
44  
45 Uncertainty related to whether people would associate with them if they revealed their HIV  
46 positive status. Some worried about accidental disclosure. One woman described how she felt  
47 she had to limit her associations with friends from a HIV Community Organization as she didn’t  
48 know how she would explain these relationships to her family. Many women had not disclosed  
49  
50  
51  
52  
53  
54  
55  
56  
57  
58  
59  
60

1  
2  
3 to immediate family members. These worries and concerns often increased social isolation or  
4  
5 prohibited women from seeking supports from loved ones and friends.  
6  
7

8 I'm very scared. I pick who I want to mix with because if I mix with people and  
9  
10 they know my status, they won't want to mix with me. Believe me, that is the  
11  
12 truth. People do not mix with people with HIV. (P1)  
13  
14  
15

16 v) Maintaining housing and adequate finances  
17  
18

19 Nine women expressed financial and housing concerns. Maintaining housing and  
20  
21 adequate finances were closely linked as housing was often the most significant living expense.  
22  
23 The majority of women were in precarious employment, under-employed or on government  
24  
25 disability pensions. Women worried about ageism affecting their employment status. Many  
26  
27 women lived in supportive housing units, which over time became undesirable due to conflicts  
28  
29 with neighbours and concerns about living conditions. Some women had not worked in many  
30  
31 years and had given up on finding employment. Others worked in voluntary positions with HIV  
32  
33 community organizations.  
34  
35  
36  
37  
38

39 So, I have anxieties...related to...the future...you know...financial concerns  
40  
41 about not earning enough money, and so therefore, not having as much savings as  
42  
43 I should, etc. etc. (P2).  
44  
45  
46

47 vi) Fulfilling gendered and family roles  
48  
49

50 Over time, six women expressed uncertainty related to fulfilling gendered roles primarily  
51  
52 related to caregiving and household responsibilities. As the women were older, their children  
53  
54 were adults. Nonetheless, women valued their role as mother. One woman discussed how her  
55  
56  
57  
58  
59  
60

1  
2  
3 children were living at home for the summer and how she was now cooking and doing their  
4  
5 laundry. Another woman had to accommodate her daughter and two small grandchildren in her  
6  
7 apartment after a failed relationship. Some women who were not permanently employed took on  
8  
9 childcare responsibilities for extended family. Several women discussed the need to care for their  
10  
11 aging parents.  
12  
13

14  
15 I was having problems with being a grandmother and not being the grandma that I  
16  
17 wanted to be, you know, doing a good job and the responsibility of being a  
18  
19 grandmother, you know? (P9)  
20  
21  
22

## 23 **II Dealing with uncertainty over time**

24  
25

26 The strategies that women used to navigate through the varied sources of uncertainty  
27  
28 were revealed over time. While some women were overwhelmed and withdrew from activities  
29  
30 and participation, others moved forward. Several women described a situation of isolation at the  
31  
32 initial interviews but were able to make changes so that by the end of the study they described a  
33  
34 life which was more engaged.  
35  
36  
37

### 38 i) Withdrawing and limiting activities and participation

39  
40  
41

42 Five women's sense of being overwhelmed led them to withdraw from activities,  
43  
44 becoming more socially isolated. This was particularly evident in women who were uncertain of  
45  
46 the consequences of HIV disclosure. Rather than seeking support and sharing their challenges  
47  
48 with others, they chose to limit whom they disclosed to and avoid others. One woman's social  
49  
50 withdrawal was related to fears of getting ill. Some recognized the need for social support but  
51  
52 were reluctant to "burden" family and friends. Other women were restricted by the winter  
53  
54 weather further reinforcing their isolation.  
55  
56  
57



1  
2  
3 One of the reasons I was late this morning, my sister called me, I was almost  
4 going through the door and I couldn't tell her no because I didn't want to lie to  
5 her like, where are you going? Why can't you talk to me? And I sit and I had to  
6 talk to her for about 15 minutes. She wouldn't let go. I told her I got to go, I was  
7 telling her about something on sale today so she had the impression that I'm going  
8 to go get this thing that's on sale and didn't know I'm coming all the way here but  
9 I couldn't let her know. (P4)  
10  
11  
12  
13  
14  
15  
16  
17  
18  
19

20 ii) Engaging in meaningful activities  
21  
22

23 Five women sought activities that they felt contributed to their lives in meaningful ways.  
24 For a few this meant paid employment, though as noted this was often precarious in nature. The  
25 HIV Community Organizations provided an outlet for volunteer activities for many women; this  
26 had the added benefits of not having to worry about disclosure and providing access to support  
27 groups and education. Educating themselves about HIV led women to describe gaining a sense  
28 of control over their lives. The significant fluctuations in participation highlighted the relevance  
29 of the longitudinal inquiry; for example, one woman's life seemed hopeless at interviews 1 and  
30 2; she was depressed, isolated and said she couldn't plan for the future. By interview 4 it  
31 appeared that she had turned her life around; she changed her way of interacting with her  
32 children and ex-husband, got a pet to provide some structure and meaning in her life and found a  
33 part-time job. As she stated "I've learned I have resilience". (P3)  
34  
35  
36  
37  
38  
39  
40  
41  
42  
43  
44  
45  
46  
47  
48

49 The women who appeared to thrive over time tended to maintain a positive outlook, some  
50 through social comparisons with others. They developed a sense of purpose whether through  
51 caring for pets, family members or work activities. Many made lifestyle changes including  
52  
53  
54  
55  
56  
57  
58  
59  
60

1  
2  
3 watching their diet, being more physically active and quitting smoking. In contrast, some women  
4  
5 felt unable to plan or look at the future and described living “day by day”. A few, in spite of the  
6  
7 uncertainties, were forward thinking and had goals and aspirations.  
8  
9

10 I keep believing in my head I’m going to get a little bit better. I mean, maybe I  
11  
12 won’t get a whole lot better; I’m never obviously going to get back to what I was,  
13  
14 you know, five years ago or whatever. (P10)  
15  
16  
17

## 18 **DISCUSSION**

19  
20 This study highlights the needs of older women living with HIV related to the episodic  
21  
22 nature of disability and the associated uncertainty. The longitudinal study design allowed for a  
23  
24 more nuanced understanding of uncertainty. In some instances the source of uncertainty was  
25  
26 relatively stable over time (e.g., finances and housing) leading to chronic stressors. The episodic  
27  
28 nature of chronic illness is increasingly recognized as an important characteristic impacting on  
29  
30 disability.[14] Our study provided insights into the disabling effects of HIV in which unexpected  
31  
32 fluctuations in illness and health resulted in uncertainty and worrying about the future.  
33  
34  
35

36 Uncertainty is a defining feature of older people living with HIV[15] and is a contributor to  
37  
38 mental distress.[16] This study reinforces a model of disability of people aging with HIV which  
39  
40 had uncertainty as the core affecting all components of disability including symptoms and  
41  
42 impairments, difficulties in day to day activities and challenges to social participation.[17,18] By  
43  
44 following the women over time, the complexities of managing multiple health challenges which  
45  
46 fluctuated differentially is highlighted.  
47  
48  
49

50 Strengths of this research include the prolonged engagement and retention of all  
51  
52 participants over 20 months. In many instances, the participants were dealing with multiple  
53  
54 fluctuating health and social issues which often affected their ability to participate and engage in  
55  
56  
57  
58

1  
2  
3 their lives. If a single interview had occurred on a “good” or “bad” day the portrayal would be  
4  
5 much different and the challenges of the episodic nature of the illness would not be evident.  
6  
7 Other strengths are use of a disability lens as a foundation for this research which focused  
8  
9 attention on the health *consequences* of the comorbidities, how physical and mental health  
10  
11 diagnoses affect peoples’ lives and how environmental and personal contextual factors interact  
12  
13 with these over time. The longitudinal design of the study highlighted the uncertainty associated  
14  
15 with the challenges of managing multiple symptoms, co-morbidities and complex lives. Given  
16  
17 the potential consequences and the centrality of uncertainty in these women’s lives, developing  
18  
19 strategies to deal with stress and uncertainty in the overall management of people living with  
20  
21 HIV is essential.  
22  
23  
24  
25

26         Limitations include our recruitment process through community HIV organizations, as  
27  
28 participants who access these resources may represent a more engaged and mobile group with  
29  
30 less disability. We also did not include women who were recently diagnosed with HIV, whose  
31  
32 experiences may be very different to women who are longer term survivors and may be living  
33  
34 with the long term consequences of chronic HIV inflammation, long term toxicity of older  
35  
36 medications and having left the work force in the past prior to the advent of combination  
37  
38 antiretroviral therapy. We also recognize that some sources of uncertainty experienced may be  
39  
40 similarly experienced by men and younger women living with HIV. Additionally the 20-month  
41  
42 time frame of the study may have been insufficient to see fluctuations in more stable sources of  
43  
44 uncertainty such as housing and unemployment.  
45  
46  
47  
48

49         The women in our study experienced high levels of stress similarly reported by  
50  
51 others.[11] Stress related factors may accelerate cognitive aging in people living with HIV.[11]  
52  
53 Though many questions remain about the causal relationship, there is an association between  
54  
55  
56  
57  
58  
59  
60

1  
2  
3 anxiety and mild cognitive impairment in the general older population.[19] A multimodal  
4 integrative approach to the management of worry and anxiety, which includes exercise,  
5  
6 mindfulness and cognitive training recommended for the general population,[19] is likely to be  
7  
8 appropriate for a HIV population.  
9  
10

11  
12 Current models of disability highlight the importance of the environmental context. Our  
13  
14 longitudinal study followed the seasons over time and highlight how the uncertainty of weather  
15  
16 impacted mobility and social participation of the participants. Weather is a risk factor for social  
17  
18 isolation, health and well-being in the general older adult population,[20] but yet to be  
19  
20 specifically considered in the context of HIV. Given that older people living with HIV are at  
21  
22 increased risks for the deleterious effects of social isolation,[21] strategies to combat this are  
23  
24 warranted.  
25  
26

27  
28 Following participants over time revealed multiple forms of stigma experienced by  
29  
30 women living with HIV and how it added to the complexity of uncertainty. Other gendered  
31  
32 societal variables such as oppression and economic dependence may also contribute to  
33  
34 maintaining stigmatizing attitudes.[5] Uncertainty related to the possible reactions from those  
35  
36 who were disclosed to prevented some women from receiving necessary supports. Many of these  
37  
38 concerns were not unfounded as women had experienced unwanted disclosure from health  
39  
40 providers and alienation from their families. Older women's reluctance to disclose their status,  
41  
42 even to family members, is of particular concern given their increased vulnerability for social  
43  
44 isolation.[7,22] The perception that some people living with HIV receive preferential treatment  
45  
46 due to varying characteristics (e.g., gender, ethnicity, age) speaks to the need for women to  
47  
48 navigate self-stigma within the HIV community in addition to within their personal lives. HIV  
49  
50  
51  
52  
53  
54  
55  
56  
57  
58  
59  
60

1  
2  
3 community organizations should consider the inclusiveness of programs to address stigma and  
4 provide opportunities for the diversity of people aging with HIV.  
5  
6

7  
8 The diversity of the challenges experienced by these women highlights the importance of  
9  
10 an interprofessional approach to HIV management. As HIV continues to evolve into a chronic  
11 illness, there is a need to include rehabilitation professionals who focus on client centered  
12 management of disability on the care team. Rehabilitation strategies promote self-management  
13 approaches which help to deal with uncertainty through building skills and promoting self-  
14 efficacy.[23] For example, occupational therapists can support women's personal, environmental  
15 and occupational needs through facilitating workplace participation, advocating for funding and  
16 assisting in navigating health care and political systems.[24] We agree that self-management  
17 programs need to be flexible and tailored to the individual needs of people living with  
18 HIV.[23,25] We also support the caution of Bernardin et al[23] that not all needs can be met  
19 through chronic disease self-management programs. Basic social determinants of health such as  
20 food and housing security may need to be met through concurrent programing.  
21  
22  
23  
24  
25  
26  
27  
28  
29  
30  
31  
32  
33  
34

35 Future research should include a quantitative examination of the synergistic and additive  
36 effects to further delineate the relationship between the episodic nature of disability and  
37 uncertainty in older women and men living with HIV. Additionally, in Canada indigenous  
38 populations are disproportionately affected by HIV and further exploration of their specific  
39 disability challenges are warranted. Ultimately the effectiveness of strategies to mitigate stress  
40 and uncertainty and minimize disability in older women living with HIV needs to be determined.  
41  
42  
43  
44  
45  
46  
47  
48  
49  
50  
51  
52  
53  
54  
55  
56  
57  
58  
59  
60

## Statements

### A. Contributorship statement

PS, KKO, SN and LL developed the research question and designed the study. NG collected the data. PS, KKO, SN, LL, LB and NG participated in the data analysis. PS drafted the manuscript. KKO, SN, LL, LB and NG contributed to the critical revision and redrafting of the manuscript.

### B. Competing Interests

None to declare.

### C. Funding

This work was supported by the Canadian Institutes of Health Research (CIHR) under grant HHP 131556. K.K. O'Brien and S.A. Nixon are supported by CIHR New Investigator Awards.

### D. Data Sharing Statement

No additional data are available.

## References

- 1 Antiretroviral Therapy Cohort Collaboration. Survival of HIV-positive patients starting antiretroviral therapy between 1996 and 2013: a collaborative analysis of cohort studies. *Lancet HIV* 2017;4(8):e349–e356.
- 2 Johns NA, Wu K, Tassiopoulos K, et al. Disability Among Middle-Aged and Older Persons With Human Immunodeficiency Virus Infection. *Clin Infect Dis* 2017;65(1):83–91.
- 3 O'Brien KK, Bayoumi AM, Strike C, et al. Exploring disability from the perspective of adults living with HIV/AIDS: development of a conceptual framework. *Health Qual Life Outcomes* 2008;6:76.
- 4 O'Brien KK, Davis AM, Strike C, et al. Putting episodic disability into context: a qualitative study exploring factors that influence disability experienced by adults living with HIV/AIDS. *J Int AIDS Soc* 2009;12:30.
- 5 Durvasula R. HIV/AIDS in older women: Unique challenges, unmet needs. *Behav Med* 2014;40(3):85–98.
- 6 Stoff DM, Colosi D, Rubtsova A, et al. HIV and Aging Research in Women: An Overview. *Curr HIV/AIDS Rep* 2016 Dec;13(6):383–91.
- 7 Siemon JS, Blenkhorn L, Wilkins S, et al. A grounded theory of social participation among older women living with HIV. *Can J Occup Ther* 2013;80(4):241–50.
- 8 Warren-Jeanpiere L, Dillaway H, Hamilton P, et al. Taking it one day at a time: African American women aging with HIV and co-morbidities. *AIDS Patient Care STDS* 2014;28(7):372–80.
- 9 Plach SK, Stevens PE, Keigher S. Self-care of women growing older with HIV and/or AIDS. *West J Nurs Res* 2005;27(5):534–53.
- 10 Psaros C, Barinas J, Robbins GK, et al. Reflections on living with HIV over time: exploring the perspective of HIV-infected women over 50. *Aging Ment Health* 2015;19(2):121–8.
- 11 Vance DE, Rubin LH, Valcour V, et al. Aging and neurocognitive functioning in HIV-infected women: A review of the literature involving the women's interagency HIV study. *Curr HIV/AIDS Rep* 2016;13:399–411.

- 1  
2  
3  
4 12 NVivo qualitative data analysis Software; QSR International Pty Ltd. Version 9, 2010.  
5  
6  
7 13 Thomson R, Holland J. Hindsight, foresight and insight: The challenges of longitudinal  
8 qualitative research. *Int J Soc Res Meth* 2003;6(3):233-244.  
9  
10  
11 14 Vajravelu S, O'Brien K, Moll S, et al. The impact of the episodic nature of chronic  
12 illness: a comparison of Fibromyalgia, Multiple Sclerosis and Human Immunodeficiency Virus  
13 (HIV). *Edorium J Disabil Rehabil* 2016;2:53-65.  
14  
15  
16 15 Rosenfeld D, Ridge D, Von Lob G, on behalf of the HIV and Later Life Team. Vital  
17 scientific puzzle or lived uncertainty? Professional and lived approaches to the uncertainties of  
18 ageing with HIV. *Health Sociol Rev* 2014;23(1):20-32.  
19  
20  
21 16 Furlotte C, Schwartz K. Mental Health Experiences of Older Adults Living with HIV:  
22 Uncertainty, Stigma, and Approaches to Resilience. *Can J Aging* 2017;36(2):125-40.  
23  
24  
25 17 Solomon P, O'Brien K, Wilkins S, et al. Aging with HIV: A model of disability. *J Int*  
26 *Assoc Provid AIDS Care* 2014;13(6):519-25.  
27  
28  
29 18 Solomon P, O'Brien KK, Wilkins S, et al. Aging with HIV and disability: The role of  
30 uncertainty. *AIDS Care* 2014;26(2):240-5.  
31  
32  
33 19 Lenze EJ, Butters MA. Consequences of anxiety in aging and cognitive decline. *Am J*  
34 *Geriatr Psychiatry* 2016;24(10):843-5.  
35  
36  
37 20 Clarke PJ, Yan T, Keusch F, et al. The Impact of Weather on Mobility and Participation  
38 in Older U.S. Adults. *Am J Public Health* 2015;105(7):1489-94.  
39  
40  
41 21 Emlet CA. An examination of the social networks and social isolation of older and  
42 younger adults living with HIV/AIDS. *Health Soc Work* 2006;31(4):299-308.  
43  
44  
45 22 Grodensky CA, Golin CE, Jones C, et al. "I should know better": The roles of  
46 relationships, spirituality, disclosure, stigma, and shame for older women living with HIV  
47 seeking support in the South. *J Assoc Nurses AIDS Care* 2015;26(1):12-23.  
48  
49  
50 23 Bernardin KN, Toews DN, Restall GJ, et al. Self-management strategies for people living  
51 with human immunodeficiency virus: A scoping review. *Can J Occup Ther* 2013;80(5):314-27.  
52  
53  
54  
55  
56  
57  
58  
59  
60



1  
2  
3 24 Akhtar NF, Garcha RK, Solomon P. Experiences of women aging with the human  
4 immunodeficiency virus: A qualitative study. *Can J Occup Ther* 2017 (in press). doi:  
5 10.1177/0008417417722574.  
6  
7

8 25 Swendeman D, Ingram BL, Rotheram-Borus MJ. Common elements in self-management  
9 of HIV and other chronic illnesses: An integrative framework. *AIDS Care* 2009;21(10):1321–24.  
10  
11  
12  
13  
14  
15  
16  
17  
18  
19  
20  
21  
22  
23  
24  
25  
26  
27  
28  
29  
30  
31  
32  
33  
34  
35  
36  
37  
38  
39  
40  
41  
42  
43  
44  
45  
46  
47  
48  
49  
50  
51  
52  
53  
54  
55  
56  
57  
58  
59  
60

For peer review only

1  
2  
3  
4  
5  
6  
7  
8  
9  
10  
11  
12  
13  
14  
15  
16  
17  
18  
19  
20  
21  
22  
23  
24  
25  
26  
27  
28  
29  
30  
31  
32  
33  
34  
35  
36  
37  
38  
39  
40  
41  
42  
43  
44  
45  
46  
47  
48  
49  
50  
51  
52  
53  
54  
55  
56  
57  
58  
59  
60

**Figure Legend:**

Themes and Sub-themes of Disability Experiences of Older Women Living with HIV Over Time

For peer review only

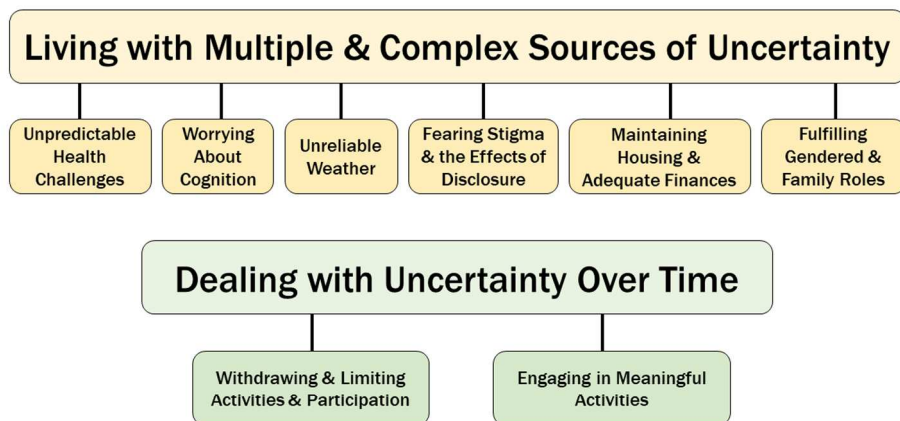

Figure 1. Themes and Sub-themes of Disability Experiences of Older Women Living with HIV Over Time

203x114mm (300 x 300 DPI)

## Standards for Reporting Qualitative Research (SRQR)\*

<http://www.equator-network.org/reporting-guidelines/srqr/>

Page/line no(s).

### Title and abstract

|                                                                                                                                                                                                                                                              |        |
|--------------------------------------------------------------------------------------------------------------------------------------------------------------------------------------------------------------------------------------------------------------|--------|
| <p><b>Title</b> - Concise description of the nature and topic of the study Identifying the study as qualitative or indicating the approach (e.g., ethnography, grounded theory) or data collection methods (e.g., interview, focus group) is recommended</p> | Page 1 |
| <p><b>Abstract</b> - Summary of key elements of the study using the abstract format of the intended publication; typically includes background, purpose, methods, results, and conclusions</p>                                                               | Page 2 |

### Introduction

|                                                                                                                                                                     |                               |
|---------------------------------------------------------------------------------------------------------------------------------------------------------------------|-------------------------------|
| <p><b>Problem formulation</b> - Description and significance of the problem/phenomenon studied; review of relevant theory and empirical work; problem statement</p> | Pg 4 ln 38-54<br>Pg 5 ln 2-45 |
| <p><b>Purpose or research question</b> - Purpose of the study and specific objectives or questions</p>                                                              | Pg 5 40-47                    |

### Methods

|                                                                                                                                                                                                                                                                                                                                                                                                             |                             |
|-------------------------------------------------------------------------------------------------------------------------------------------------------------------------------------------------------------------------------------------------------------------------------------------------------------------------------------------------------------------------------------------------------------|-----------------------------|
| <p><b>Qualitative approach and research paradigm</b> - Qualitative approach (e.g., ethnography, grounded theory, case study, phenomenology, narrative research) and guiding theory if appropriate; identifying the research paradigm (e.g., postpositivist, constructivist/ interpretivist) is also recommended; rationale**</p>                                                                            | Pg 5 ln 51-53<br>Pg 6 ln 15 |
| <p><b>Researcher characteristics and reflexivity</b> - Researchers' characteristics that may influence the research, including personal attributes, qualifications/experience, relationship with participants, assumptions, and/or presuppositions; potential or actual interaction between researchers' characteristics and the research questions, approach, methods, results, and/or transferability</p> | Pg 6 49-54                  |
| <p><b>Context</b> - Setting/site and salient contextual factors; rationale**</p>                                                                                                                                                                                                                                                                                                                            | Pg 5 ln 52- pg 6 ln 6       |
| <p><b>Sampling strategy</b> - How and why research participants, documents, or events were selected; criteria for deciding when no further sampling was necessary (e.g., sampling saturation); rationale**</p>                                                                                                                                                                                              | Pg 6 ln 6-13                |
| <p><b>Ethical issues pertaining to human subjects</b> - Documentation of approval by an appropriate ethics review board and participant consent, or explanation for lack thereof; other confidentiality and data security issues</p>                                                                                                                                                                        | Pg 7 ln 47-50               |
| <p><b>Data collection methods</b> - Types of data collected; details of data collection procedures including (as appropriate) start and stop dates of data collection and analysis, iterative process, triangulation of sources/methods, and modification of procedures in response to evolving study findings; rationale**</p>                                                                             | Pg 6 ln 15-45               |

|                       |                                                                                                                                                                                                                                                       |                               |
|-----------------------|-------------------------------------------------------------------------------------------------------------------------------------------------------------------------------------------------------------------------------------------------------|-------------------------------|
| 1<br>2<br>3<br>4<br>5 | <b>Data collection instruments and technologies</b> - Description of instruments (e.g., interview guides, questionnaires) and devices (e.g., audio recorders) used for data collection; if/how the instrument(s) changed over the course of the study | Pg 6 ln 15-35                 |
| 6<br>7<br>8           | <b>Units of study</b> - Number and relevant characteristics of participants, documents, or events included in the study; level of participation (could be reported in results)                                                                        | Pg 8 5-17                     |
| 9<br>10<br>11<br>12   | <b>Data processing</b> - Methods for processing data prior to and during analysis, including transcription, data entry, data management and security, verification of data integrity, data coding, and anonymization/de-identification of excerpts    | Pg 6 ln 54-pg 7 ln 3          |
| 13<br>14<br>15<br>16  | <b>Data analysis</b> - Process by which inferences, themes, etc., were identified and developed, including the researchers involved in data analysis; usually references a specific paradigm or approach; rationale**                                 | Pg7 ln 3 - 45                 |
| 17<br>18<br>19<br>20  | <b>Techniques to enhance trustworthiness</b> - Techniques to enhance trustworthiness and credibility of data analysis (e.g., member checking, audit trail, triangulation); rationale**                                                                | Pg 7 ln 6-15<br>Pg 7 ln 35-40 |

## Results/findings

|                            |                                                                                                                                                                                                   |                                              |
|----------------------------|---------------------------------------------------------------------------------------------------------------------------------------------------------------------------------------------------|----------------------------------------------|
| 23<br>24<br>25<br>26       | <b>Synthesis and interpretation</b> - Main findings (e.g., interpretations, inferences, and themes); might include development of a theory or model, or integration with prior research or theory | Pg 8 ln 28 – pg 15 ln 9                      |
| 27<br>28<br>29<br>30<br>31 | <b>Links to empirical data</b> - Evidence (e.g., quotes, field notes, text excerpts, photographs) to substantiate analytic findings                                                               | Quotes throughout results section pgs 8 – 15 |

## Discussion

|                                        |                                                                                                                                                                                                                                                                                                                                                                                                             |                                            |
|----------------------------------------|-------------------------------------------------------------------------------------------------------------------------------------------------------------------------------------------------------------------------------------------------------------------------------------------------------------------------------------------------------------------------------------------------------------|--------------------------------------------|
| 34<br>35<br>36<br>37<br>38<br>39<br>40 | <b>Integration with prior work, implications, transferability, and contribution(s) to the field</b> - Short summary of main findings; explanation of how findings and conclusions connect to, support, elaborate on, or challenge conclusions of earlier scholarship; discussion of scope of application/generalizability; identification of unique contribution(s) to scholarship in a discipline or field | Pg 15 ln 13-41<br>Pg 16 ln 42- pg 18 ln 29 |
| 41                                     | <b>Limitations</b> - Trustworthiness and limitations of findings                                                                                                                                                                                                                                                                                                                                            | Pg 16 ln 19-40                             |

## Other

|                |                                                                                                                                               |                |
|----------------|-----------------------------------------------------------------------------------------------------------------------------------------------|----------------|
| 44<br>45<br>46 | <b>Conflicts of interest</b> - Potential sources of influence or perceived influence on study conduct and conclusions; how these were managed | Pg 19 ln 19    |
| 47<br>48       | <b>Funding</b> - Sources of funding and other support; role of funders in data collection, interpretation, and reporting                      | Pg 19 ln 25-29 |

\*The authors created the SRQR by searching the literature to identify guidelines, reporting standards, and critical appraisal criteria for qualitative research; reviewing the reference lists of retrieved sources; and contacting experts to gain feedback. The SRQR aims to improve the transparency of all aspects of qualitative research by providing clear standards for reporting qualitative research.

1  
2  
3  
4  
5  
6  
7  
8  
9  
10  
11  
12  
13  
14  
15  
16  
17  
18  
19  
20  
21  
22  
23  
24  
25  
26  
27  
28  
29  
30  
31  
32  
33  
34  
35  
36  
37  
38  
39  
40  
41  
42  
43  
44  
45  
46  
47  
48  
49  
50  
51  
52  
53  
54  
55  
56  
57  
58  
59  
60

\*\*The rationale should briefly discuss the justification for choosing that theory, approach, method, or technique rather than other options available, the assumptions and limitations implicit in those choices, and how those choices influence study conclusions and transferability. As appropriate, the rationale for several items might be discussed together.

**Reference:**

O'Brien BC, Harris IB, Beckman TJ, Reed DA, Cook DA. **Standards for reporting qualitative research: a synthesis of recommendations.** *Academic Medicine*, Vol. 89, No. 9 / Sept 2014  
DOI: 10.1097/ACM.0000000000000388

For peer review only
